# Supplementary material for: Disruption of Super‐Enhancers in Activated Pancreatic Stellate Cells Facilitates Chemotherapy and Immunotherapy in Pancreatic Cancer
Source: PubMed Central journal article supplement (PMC11040371; doi:10.1002/advs.202308637), 2024-02-28
Supplement: ADVS-11-2308637-s001.pdf [file ADVS-11-2308637-s001.pdf]

## Supporting Information

for *Adv. Sci.*, DOI 10.1002/adv.202308637

Disruption of Super-Enhancers in Activated Pancreatic Stellate Cells Facilitates  
Chemotherapy and Immunotherapy in Pancreatic Cancer

*Yazhou Wang, Kai Chen, Gang Liu, Chong Du, Zhaoxia Cheng, Dan Wei, Fenfen Li, Chen Li,  
Yinmo Yang\*, Ying Zhao\* and Guangjun Nie\**

## Supplementary Information

### Disruption of Super-enhancers in Activated Pancreatic Stellate Cells Facilitates Chemotherapy and Immunotherapy in Pancreatic Cancer

Yazhou Wang *et al.*

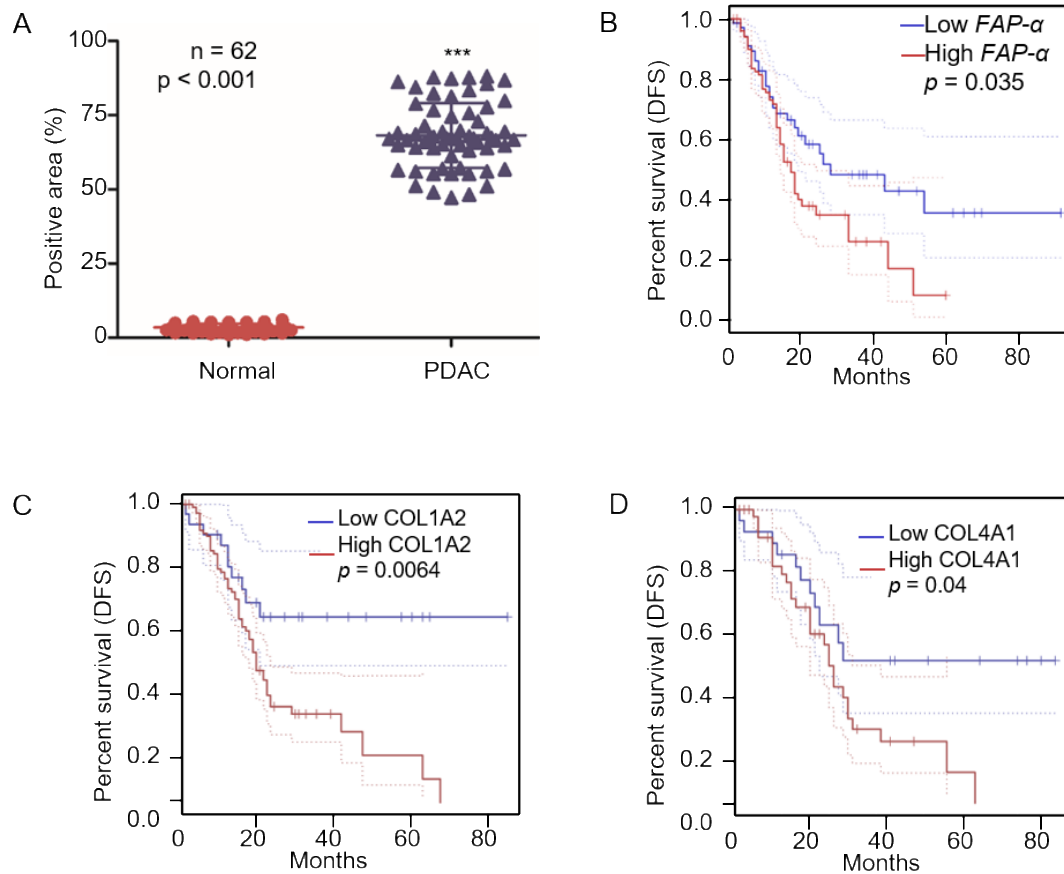

**Figure S1. Biomarker analysis of PDAC.** (A) Quantitative analysis of FAP- $\alpha$  expression detected by IHC in normal and PDAC tissues,  $n = 62$ . (B-D) Kaplan-Meier curves of PDAC patients with low or high expression of FAP- $\alpha$ , COL1A2 and COL4A1.



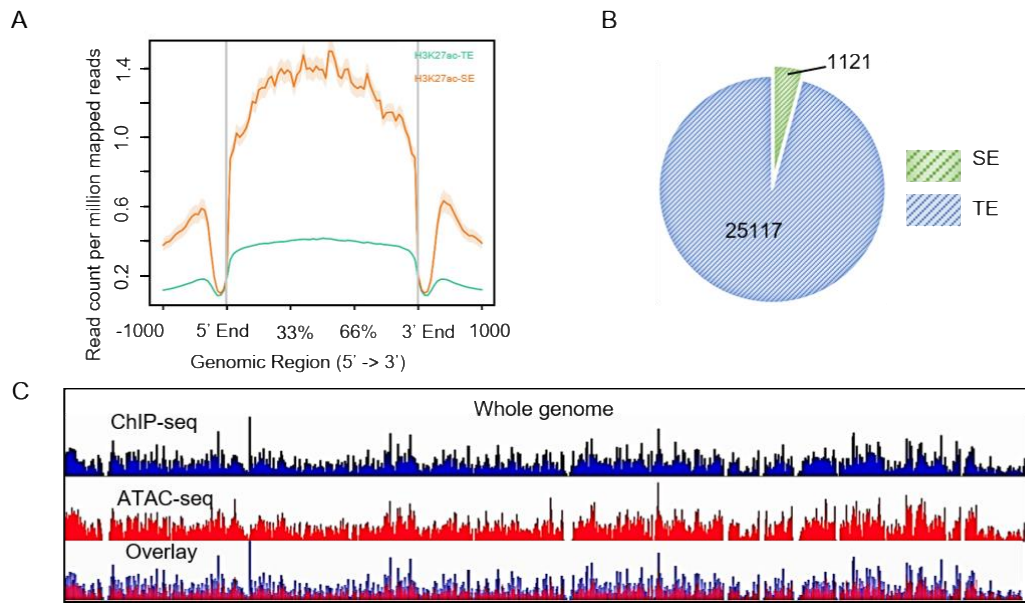

**Figure S3. Superenhancer profile in a-PSCs.** (A) Signals for typical enhancers (TEs) and superenhancers (SEs) in a-PSCs. (B) A pie chart exhibiting the numbers of TEs and SEs in a-PSCs. (C) Whole-genome H3K27ac ChIP-seq and ATAC-seq profiles in a-PSCs visualized by IGV software.

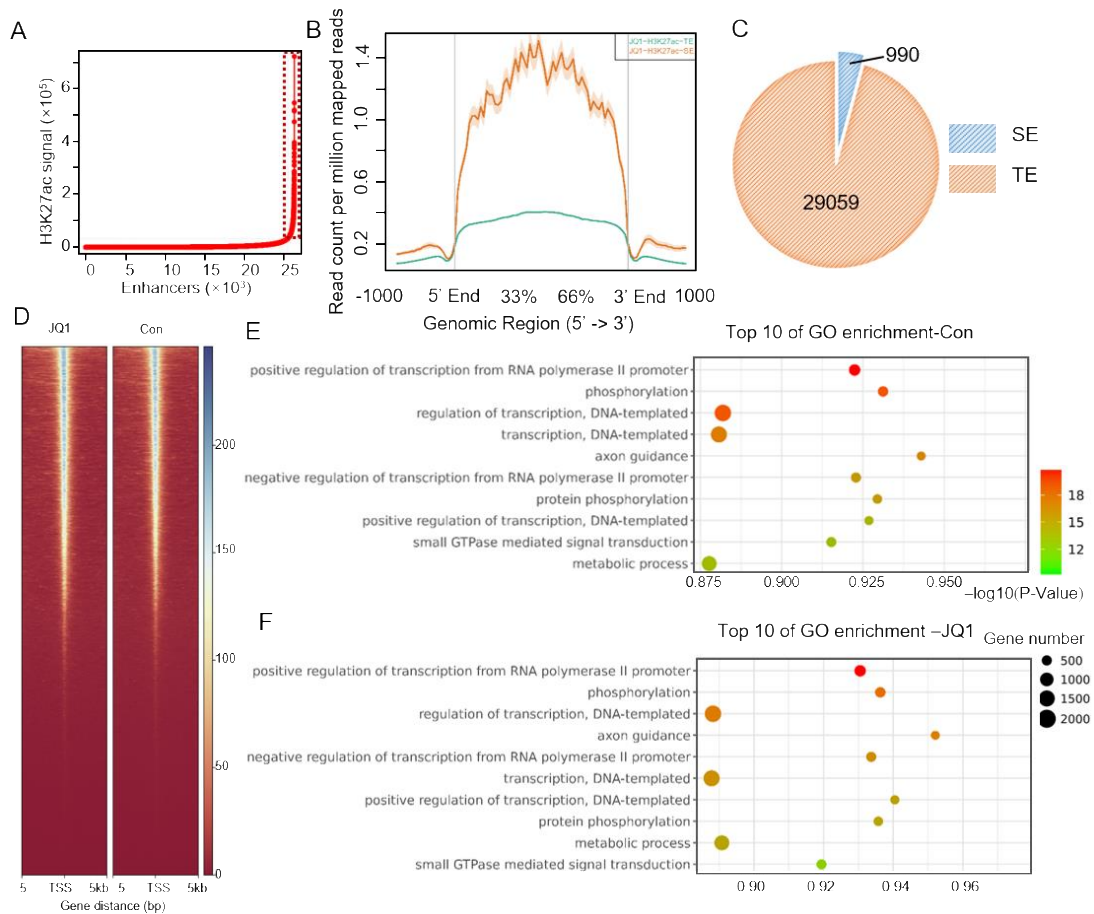

**Figure S4. Superen-hancer profile in JQ1-treated a-PSCs.** (A) SEs in JQ1-treated a-PSCs identified according to H3K27Ac ChIP-seq signals. Enhancers above the inflection point of the curve (those in the dotted rectangle) were defined as SEs. (B) TE and SE signals in JQ1-treated a-PSCs. (C) A pie chart exhibiting the numbers of TEs and SEs in a-PSCs. (D) ATAC-Seq signals in a-PSCs with and without JQ1 treatment. The intensity of chromatin accessibility is indicated by the color. Peaks are grouped based on K-means clustering. (E and F) The top 10 GO terms enriched with genes located in open chromatin regions in a-PSCs and JQ1-treated a-PSCs.

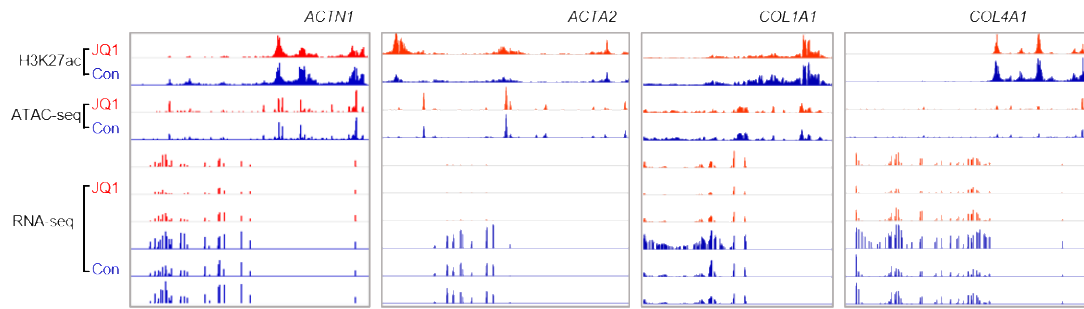

**Figure S5.** H3K27Ac ChIP-seq, ATAC-seq and RNA-seq profiles for a-PSC-specific genes *ACTN1*, *ACTA2*, *COL1A1* and *COL4A1* visualized by IGV software.

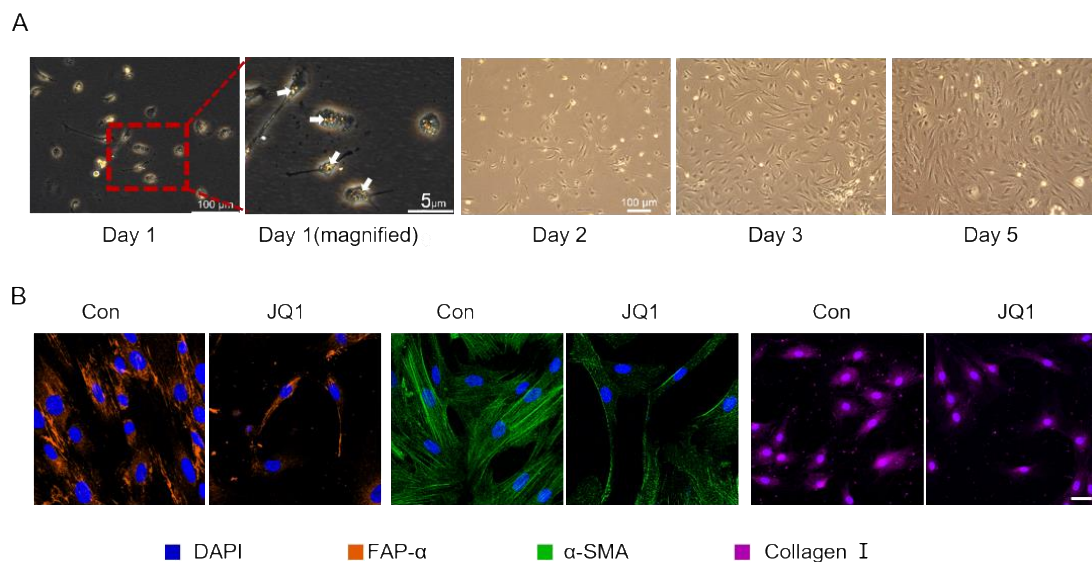

**Figure S6. Mouse PSCs culturing.** (A) The morphology of mPSCs extracted from the pancreas of C57BL/6 mice imaged at days 1, 2, 3 and 5. (B) Representative immunofluorescence images for mPSCs and JQ-1-treated mPSCs stained with anti-FAP- $\alpha$ ,  $\alpha$ -SMA and collagen I antibodies. Scale bar, 20  $\mu$ m.



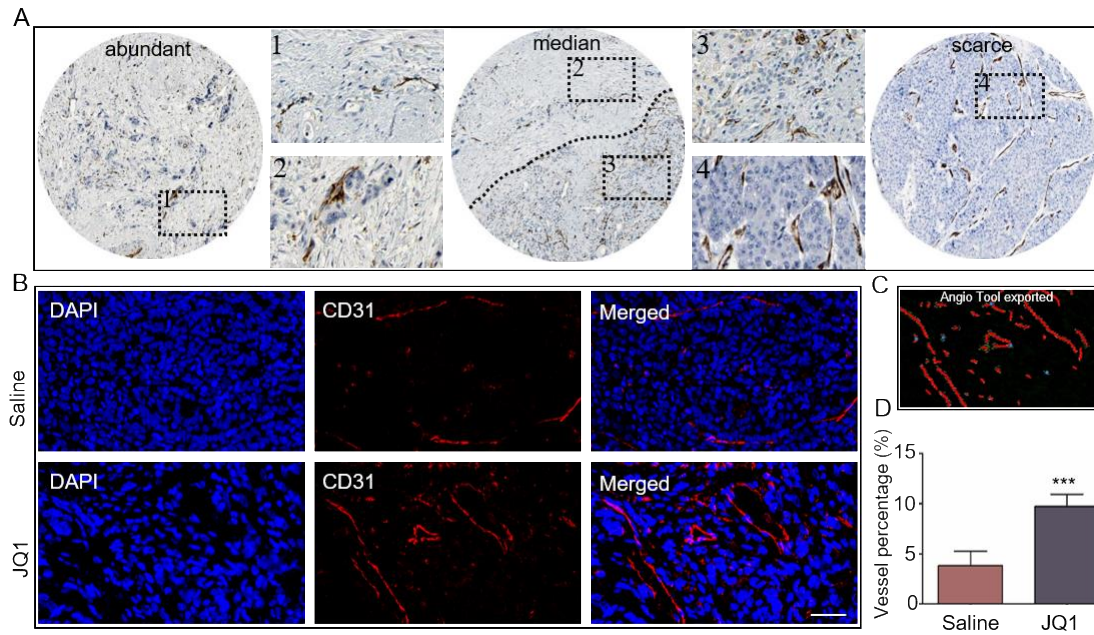

**Figure S7. Disruption of SEs promoted vascularization in the patient-derived xenograft (PDX) mouse pancreatic cancer model. (A)** IHC staining against CD31 in PDAC tissues (data from the Human Protein Atlas database). **(B)** Representative immunofluorescence findings for CD31 in pancreatic cancer tumor slices obtained from PDX mice treated with saline or JQ1. Scale bar, 50  $\mu\text{m}$ .  $n = 3$  for each group. **(C)** A picture exported from AngioTool showing CD31-positive areas in a PDX tumor slice. **(D)** Quantitative analysis of CD31-positive areas in PDX tumors obtained from saline- or JQ1-treated mice. Data are shown as mean  $\pm$  SD and  $p$  values were determined by a two-tailed unpaired t-test, \*\*\*  $p < 0.001$  compared with the con or Saline groups.

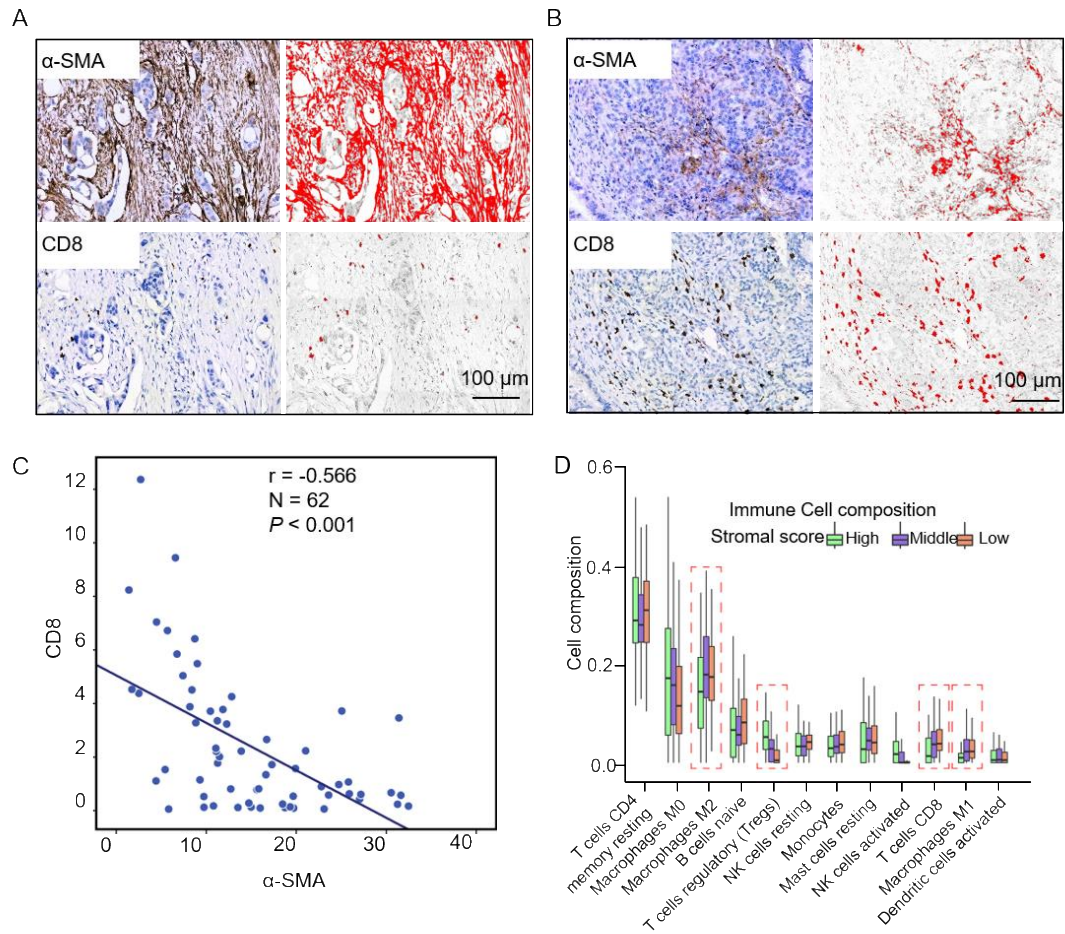

**Table S1. Antibody information**

| Target protein | Application | Manufacturer | Cat. No  | Dilution folds       |
|----------------|-------------|--------------|----------|----------------------|
| FAP- $\alpha$  | IHC/WB/IF   | Abcam        | ab207178 | 1:500/1:1000/1:500   |
| $\alpha$ -SMA  | IHC/WB/IF   | Abcam        | ab7817   | 1:1000/1:2000/1:1000 |



|             |           |             |            |                     |
|-------------|-----------|-------------|------------|---------------------|
| Fibronectin | IHC/IF    | Abcam       | ab2413     | 1:1000/1:500        |
| Collagen I  | IHC/WB/IF | Abcam       | ab138492   | 1:1000/1:2000/1:500 |
| IL6         | IF        | Abcam       | ab233706   | 1:100               |
| BRD4        | WB        | Abcam       | ab243862   | 1:1000              |
| CD31        | IF        | Abcam       | ab76533    | 1:100               |
| PCNA        | IHC       | Proteintech | 10205-2-AP | 1:500               |
| CD3         | FCM       | Biologend   | 100204     | 1:100               |
| CD8         | FCM       | Biologend   | 100712     | 1:100               |
| CD8         | IHC/IF    | Abcam       | ab237709   | 1:1000/1:200        |
| Foxp3       | FCM       | Biologend   | 126404     | 1:50                |
| CD49b       | FCM       | Biologend   | 103515     | 1:50                |

**Table S2. Target sequences of small guide RNAs used for CRISPR-Cas9 genome editing**

| Name               | Target sequence      |
|--------------------|----------------------|
| FAP- $\alpha$ -SE1 | TAAATGGTGAGTAGATCCAC |
| FAP- $\alpha$ -SE2 | TCCGTTACTAGTATTGCAA  |
| IL6-SE1            | TTCAGAACACAGAGACGTCA |
| IL6-SE2            | GGGAGAGTTAGGATGTGCGC |
| IL6-SE3            | TTTACAACTTCTTACGACT  |

**Table S3. Primer sequences used for qRT-PCR**

| Gene name                        | Amplification direction | Sequence                 |
|----------------------------------|-------------------------|--------------------------|
| <i>h-FAP-<math>\alpha</math></i> | Forward                 | TGGTATAGCAGTGGCTCCAGTCTC |
|                                  | Reverse                 | ATCTGCTGTTCCGTGGATGAGAAG |
| <i>h-ACTA2</i>                   | Forward                 | TCGTGCTGGACTCTGGAGATGG   |
|                                  | Reverse                 | CCACGCTCAGTCAGGATCTTCATG |
| <i>h-COL1A1</i>                  | Forward                 | AAAGATGGACTCAACGGTCTC    |
|                                  | Reverse                 | AAAGATGGACTCAACGGTCTC    |
| <i>h-IL6</i>                     | Forward                 | CACTGGTCTTTTGGAGTTTGAG   |
|                                  | Reverse                 | GGACTTTTGTACTCATCTGCAC   |
| <i>m-Fap-<math>\alpha</math></i> | Forward                 | TTGTTTCGACACCAGCTTTTAG   |
|                                  | Reverse                 | CCACTTGCCACTTGTAATTTGA   |
| <i>m-Acta2</i>                   | Forward                 | GCGTGGCTATTCCTTCGTGACTAC |

|                  |         |                         |
|------------------|---------|-------------------------|
|                  | Reverse | CGTCAGGCAGTTCGTAGCTCTTC |
| <i>m-Coll1a1</i> | Forward | TGAACGTGGTGTACAAGGTC    |
|                  | Reverse | CCATCTTTACCAGGAGAACCAT  |
| <i>m-Il6</i>     | Forward | CTCCCAACAGACCTGTCTATAC  |
|                  | Reverse | CCATTGCACAACCTCTTTTCTCA |

**Table S4. Sequences of primers targeting *FAP-α* and *IL6*-associated SEs used for BRD4-ChIP-qPCR**

| Gene name         | Amplification direction | Sequence                 |
|-------------------|-------------------------|--------------------------|
| FAP- $\alpha$ -SE | Forward                 | AGAGGTTGTGAGACTTTGCTGTG  |
|                   | Reverse                 | ACCCTCCAGCATAACCTCTCTG   |
| IL6-SE            | Forward                 | CACGGCATTCTACCCTGCACTG   |
|                   | Reverse                 | AGGCAGGTCACAGGAGACTCTATG |
